# Supplementary material for: Fitness of mCherry Reporter Tick-Borne Encephalitis Virus in Tick Experimental Models
Source: MDPI journal article supplement (doi:10.3390/v14122673), 2022-11-29
Supplement: s1 [file s1]

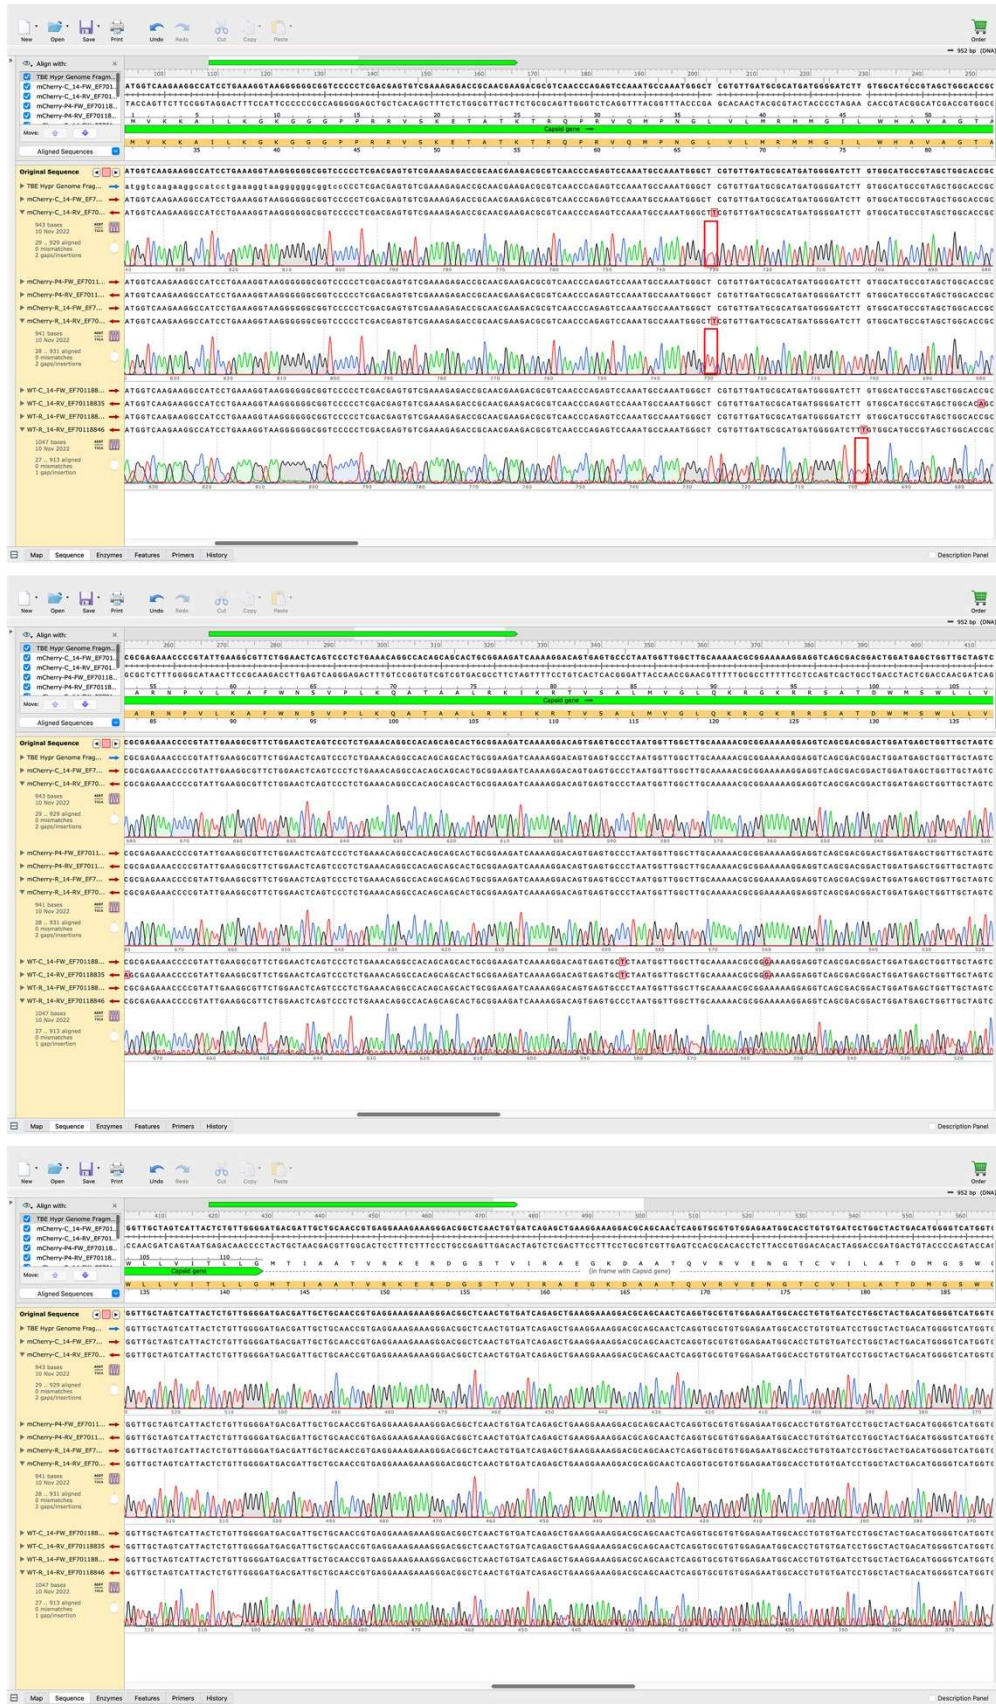

**Figure S1. DNA sequencing of capsid gene from mCherry Hypr revertant and WT Hypr variants in tick samples as well as mCherry Hypr passage 4 (revertant). Red rectangles denote occasions of a single nucleotide insertion in reverse reads (demonstrated by the chromatograms) of mCherry Hypr-inoculated as well as WT Hypr-inoculated ticks, apparently caused by the lower quality of the reads. The majority of the reads (7/10) do not contain**

a nucleotide insertion, thus confirming a sequence identity of the capsid gene among the viruses used in our studies. mCherry-C\_14-FW\_EF70118836=Tick transcoxally infected with mCherry Hypr, 14 dpi, forward read; mCherry-C\_14-RV\_EF70118844=Tick transcoxally infected with mCherry Hypr, 14 dpi, reverse read; mCherry-P4-FW\_EF70118832=mCherry Hypr passage 4 (revertant) in BHK-21 cells, forward read; mCherry-P4-RV\_EF70118833=mCherry Hypr passage 4 (revertant) in BHK-21 cells, reverse read; mCherry-R\_14-FW\_EF70118847=Tick intrarectally infected with mCherry Hypr, 14 dpi, forward read; mCherry-R\_14-RV\_EF70118848=Tick intrarectally infected with mCherry Hypr, 14 dpi, reverse read; WT-C\_14-FW\_EF70118834=Tick transcoxally infected with WT Hypr, 14 dpi, forward read; WT-C\_14-RV\_EF70118835=Tick transcoxally infected with WT Hypr, 14 dpi, reverse read; WT-R\_14-FW\_EF70118845=Tick intrarectally infected with WT Hypr, 14 dpi, forward read; WT-R\_14-RV\_EF70118846=Tick intrarectally infected with WT Hypr, 14 dpi, reverse read.
